# Supplementary material for: Comprehensive Characterization of Transcriptional Activity during Influenza A Virus Infection Reveals Biases in Cap-Snatching of Host RNA Sequences
Source: PubMed Central journal article supplement (PMC7199409; doi:10.1128/jvi.01720-19), 2020-05-04
Supplement: JVI.01720-19-s0001.pdf [file JVI.01720-19-s0001.pdf]

Table S1: mRNA sequences for A/Udorn/H3N2 putative splice variants.

>udornh3n2\_segment7\_825\_nt

AGCAAAAGCAGGTGATATTGTGGATTCTTGATCGTCTTTTTTTTCAAATGCATCTATCGATTCTTTGAA  
CACGGTCTGAAAAGAGGGCCTTCTACGGAAGGAGTACCTGAGTCTATGAGGGAAGAATATCGAAAGGA  
ACAGCAGAGTGCTGTGGATGCTGACGACAGTCATTTTGTGAGCATAGAGCTGGAGTAAAAAACTACCT  
TGTTTCTACT

>udornh3n2\_segment6\_926\_nt

AGCAAAAGCAGGTAGATATAAATGTGAAAGATTATAGCATTGATTCCAGTTATGTGTGCTCAGGGCTT  
GTTGGCGACACACCCAGAAACAACGACAGATCTAGCAATAGCTATTGCCGGAATCCTAACAAATGAGAA  
AGGGAATCACGGAGTGAAAGGCTGGGCCTTTGACGATGGAAATGACGTGTGGATGGGAAGAACGATCA  
GCGAGGATTCACGCTCAGGTTATGAAACCTTCAAAGTCATTGGTGGTTGGTCCACACCTAATCCAAA  
TTGCAGATAAATAGGCAAGTCATAGTTGACAGCGATAATAGGTCAGGTTATTCTGGTATTTTCTCTGT  
TGAGGGCAAAGCTGCATCAATAGGTGCTTTTATGTGGAGTTGATAAGGGGAAGGGAACAGGAAACTA  
GAGTATGGTGGACCTCAAACAGTATTGTTGTGTTTTGTGGCACTTCAGGTACCTATGGGACAGGCTCA  
TGGCCTGATGGGGCGGACATCAATCTCATGCCTATATAAGCTTTCGCAATTTTAGAAAAAACTCCTT  
GTTTCTACT

>udornh3n2\_segment6\_652\_nt

AGCAAAAGCAGGGTAGACAGTATTGGTTCATGGTCTCAAATATCCTCAGGACCCAGGAGTCGGAATG  
CGTTTGTATCAATGGGACTTGTACAGTAGTAATGACTGATGGAAGTGCTTCAGGAAGAGCTGATACTA  
AAATACTATTCATTGAAGAGGGGAAAATTGTTTCATATTAGCCCATTGTCAGGAAGTGCTCAGCATGTA  
GAGGAGTGTTCTGTTATCCTCGATATCCTGGTGTGAGATGTATCTGCAGAGACAACCTGGAAAGGCTC  
TAATAGGCCCGTCGTAGATATAAATGTGAAAGATTATAGCATTGATTCCAGTTATGTGTGCTCAGGGC  
TTGTTGGCGACACACCCAGAAACAACGACAGATCTAGCAATAGCTATTGCCGGAATCCTAACAAATGAG  
AAAGGGAATCACGGAGTGAAAGGCTGGGCCTTTGACGATGGAAATGACGTGTGGATGGGAAGAACGAT  
CAGCGAGGATTCACGCTCAGGTTATGAAACCTTCAAAGTCATTGGTGGTTGGTCCACACCTAATTCCA  
AATTGCAGATAAATAGGCAAGTCATAGTTGACAGCGATAATAGGTCAGGTTATTCTGGTATTTTCTCT  
GTTGAGGGCAAAGCTGCATCAATAGGTGCTTTTATGTGGAGTTGATAAGGGGAAGGGAACAGGAAAC  
TAGAGTATGGTGGACCTCAAACAGTATTGTTGTGTTTTGTGGCACTTCAGGTACCTATGGGACAGGCT  
CATGGCCTGATGGGGCGGACATCAATCTCATGCCTATATAAGCTTTCGCAATTTTAGAAAAAACTCC  
TTGTTTCTACT

>udornh3n2\_segment5\_835\_nt

AGCAAAAGCAGGTAATATTGAGAGGGTCAGTTGCTCACAAATCTTGTCTGCCTGCCTGTGTGTATGGA  
CCTGCCGTAGCCAGTGGGTACGACTTCGAAAAAGAGGGATACTTTTAGTGGGAATAGACCTTTTCAA  
ACTACTTCAAACAGCCAAGTATACAGCCTAATCAGACCGAACGAGAATCCAGCACACAAGAGTCAGC  
TGGTGTGGATGGCATGCAATTCTGCTGCATTTGAAGATCTAAGATTATTAAGCTTCATCAGAGGGACC  
AAAGTATCTCCAAGGGGAAACTTTCAACTAGAGGAGTACAAATTGCTTCAAATGAAAACATGGATAC  
TATGGAATCAAGTACTCTTGAAGTGAAGCAGGTAAGTGGCCATAAGGACCAGAAGTGGAGGAAACA  
CTAATCAACAGAGGGCCTCCGCAGGCCAAATCAGTGTGCAACCTGCATTTTCTGTGCAAAGAAACCTC  
CCATTTGACAAATCAACCATCATGGCAGCATTCACTGGGAATACGAGGGGAAGAACCTCAGACATGAG  
GGCAGAAATCATAAGGATGATGGAAGGTGCAAAACCAGAAGAAGTGTCCCTTCCGTGGGCGGGGAGTCT  
TCGAGCTCTCGGACGAAAAGGCAACGAACCCGATCGTGCCCTCTTTTGCATGAGTAATGAAGGATCT  
TATTTCTTCGGAGACAATGCAGAGGAGTACGACAATTAAGGAAAAATACCCTTGTCTACT

>udornh3n2\_segment4\_1493\_nt

AGCAAAAGCAGGTGTGACAAATGCTTGCATAGGGTCAATCAGAAATGGGACTTATGACCATGATGTATA  
CAGAGACGAAGCATTAAACAACCGGTTTTCAGATCAAAGGTGTTGAACTGAAGTCAGGATACAAAGACT  
GGATCCTGTGGATTTCTTTGCCATATCATGCTTTTTGCTTTGTGTTGTTTTGCTGGGGTTTCATCATG  
TGGCCTGCCAGAAAGGCAACATTAGGTGCAACATTTGCATTTGAGTGTATTAGTAATTAACAAACACC  
CTTGTCTACT

Table S8: Details of Udorn sequences used to assign identity to segments.

Provided in Fasta format.

Udorn genome/mRNA sequences

Segment 1 UTRs from CY003535

>gi|89892490|gb|CY009643.1| Influenza A virus (A/Udorn/72(H3N2))

segment 1, complete sequence

```
AGCAAAAGCAGGTCAATTATATTTCAATATGGAAAGAATAAAAGAACTACGGAATCTGATGTGCGCAGTC
TCGCACTCGCGAGATACTAACAAAAACCACAGTGGACCATATGGCCATAATTAAGAAGTACACATCAG
GGAGACAGGAAAAGAACCCTGCACTTAGGATGAAATGGATGATGGCAATGAAATATCCAATTACAGCT
GACAAGAGGATAACAGAAATGGTTCCTGAGAGAAATGAGCAAGGACAAACCCTATGGAGTAAAATGAG
TGATGCCGGGTGAGATCGAGTGATGGTATCACCTTTGGCGGTGACATGGTGGAAATAGAAATGGACCAG
TGACAAGTACGGTTCATTATCCAAAAGTCTACAAGACTTATTTTGATAAAGTCGAAAGGTTAAAACAT
GGAACCTTTGGCCCTGTCCATTTTAGAAACCAAGTCAAAATACGCCGAAGAGTTGACATAAACCCCTGG
TCATGCAGACCTCAGTGCCAAGGAGGCACAAGATGTAATCATGGAAGTTGTTTTCCCAATGAAGTGG
GGGCCAGGATACTAACGTCGGAATCACAATTAACAATAACCAAAGAGAAAAAAGAAGAACTCCAAGAT
TGCAAAATTTCTCCTTTGATGGTTGCATACATGTTAGAGAGAGAACTTGTCCGAAAAACGAGATTTCT
CCCAGTTGCTGGTGAACAAGCAGTGTGTACATTGAAGTGTACACTTGACTCAAGGAACGTGTTGGG
AACAGATGTACTCCAGGTGGAGAAGTGAGGAATGACGATGTTGACCAAAGCCTAATTATTGCAGCC
AGGAACATAGTGAGAAGAGCAGCAGTATCAGCAGATCCACTAGCATCTTTATTGGAGATGTGCCACAG
CACACTGATTGGCGGGACAAGGATGGTGGACATTCTTAGGCAGAACCAGCGGAAGAACAAGCTGTGG
ATATATGCAAGGCTGCAATGGGACTGAGGATCAGCTCATCCTTCAGTTTTGGTGGGTTACATTTAAG
AGAACAAGCGGGTCATCAATCAAAGAGAGGAAGAAGTGCTTACGGGCAATCTCCAACATTGAAAAT
AAGGGTGCATGAGGGGTACGAGGAGTTCACAATGGTGGGAAAAGGGCAACAGCTATACTCAGAAAAG
CAACCAGGAGATTGGTTCAGCTTATAGTGAGTGAAGGGACGAGCAGTCAATAGCCGAA
GCGATAATTGTAGCCATGGTGTTCACAAGAGGATTGCATGATAAAGCAGTTAGAGGTGACCTGAA
TTTTCGTTAACAGGGCAAAATCAGCGGTTGAATCCCATGCATCAACTTTTAAGGCATTTTCAGAAAAGATG
CGAAAGTGCTTTTTTCAGAATTGGGGAATTGAACATATCGACAATGTGATGGGAATGGTTGGAGTATTA
CCAGACATGACTCCAAGCACAGAGATGTCAATGAGAGGAATAAGAGTCAGCAAAATGGGCGTGGATGA
ATACTCCAGCACAGAGAGGGTAGTGGTTAGCATTGATCGGTTTTTTGAGAGTTCGAGACCAACGTGGGA
ATGTATTACTATCTCCTGAGGAGGTCAGTGAACACAGGGGACAGAGAGACTGACAATAACTTACTCA
TCGTCAATGATGTGGGAGATTAATGGCCCTGAGTCAGTGTGGTCAATACCTATCAATGGATCATCAG
AAACTGGGAAACTGTTAAAATTCAATGGTCTCAGAATCCTACAATGTTGTACAACAAAATGGAATTTG
AGCCATTTAGTCTTTAGTTCCTAAGGCCATTAGAGGCCAATACAGTGGATTTGTCAGAACTCTATTC
CAACAAATGAGGGATGTACTTGGGACATTTGATACCACCCAGATAATAAAGCTTCTCCCCTTTGCAGC
CGCCCCACCAAGCAAAGTAGAATGCAGTTCTCTTCATTGACTGTGAATGTGAGGGGATCAGGGATGA
GAATACTTGTAAAGGGGCAATTCTCCTGTATTCACTACAACAAGACCACTAAAAGACTAACAATTCTC
GGAAAAGATGCTGGCACTTTAATTGAAGACCCAGATGAAAGCACATCCGGAGTGGAGTCCGCTGTTTT
GAGAGGATTTCTCATTCTAGGTAAGGAAGATAGAAGATACGGACCAGCATTAAAGCATCAATGAACTGA
GTAACCTTGCAAAAGGAGAAAAGGCTAATGTGCTAATTGGGCAAGGAGACGTGGTGTGGTAATGAAA
CGAAAACGGGACTCTAGCATACTTACTGACAGCCAGACAGCGACCAAAAAGAATTCGGATGGCCATCAA
TTAATGTTGAATAGTTTAAAAACGACCTTGTCTACT
```

Segment 2 UTRS from EF467819

>gi|89892487|gb|CY009642.1| Influenza A virus (A/Udorn/72(H3N2))

segment 2, complete sequence

```
AGCGAAAGCAGGCAAACCATTTGAATGGATGTCAACCCGACTTTACTTTTCTTGAAAGTTCCAGCGCA
AAATGCCATAAGCACCATTCCTTATACTGGAGATCCTCCATACAGCCATGGAACAGGAACAGGAT
ACACCATGGACACAGT
CAACAGAACACATCAATATTCAGAAAAAGGGAAGTGACAACAACACAGAACTGGGGCGCCCAAC
TTAACCAATTGATGGACCACTACCTGAGGATAATGAGCCAAGTGGATATGCACAAACAGACTGTGTC
CTGGAAGCAATGGCTTTCCTTGAAGAATCCCACCCAGGGATCTTTGAAAACCTGTCCTTGAACCGAT
```

GGAAGTCGTTCAACAAACAAGGGTGGACAGACTGACCCAAGGTCGTCAGACCTATGATTGGACATTAA  
ACAGAAATCAACCGGCCGCAACTGCATTAGCCAACACTATAGAAGTCTTCAGATCGAATGGTCTAACA  
GCTAATGAGTCGGGAAGGCTAATAGATTTCTCAAGGATGTGATGGAATCAATGGATAAAGAGGAAAT  
GGAGATAACAACACACTTCCAAAGAAAAAGAAGAGTAAGAGACAACATGACCAAGAAAATGGTCACAC  
AAAGAACAATAGGAAAGAAGAAGCAGAGAGTGAACAAGAGAAGCTATCTAATAAGAGCATTAAACATTG  
AACACAATGACCAAAGATGCAGAAAGAGGTAATTAAGAGAAGAGCTATTGCAACACCCGGGATGCA  
AATCAGAGGGTTCGTGTACTTTGTTGAAACTCTAGCTAGGAGCATTGTGTGAGAAGCTTGAACAGTCTG  
GACTTCCAGTTGGAGGTAATGAAAAGAAGGCCAAACTGGCAAATGTTGTGAGAAAGATGATGACTAAT  
TCACAAGACACAGAGCTTTCTTTCACAATTACTGGAGACAATACTAAGTGGAAATGAAAATCAAAATCC  
TCGAATGTTCTGGCGATGATTACATATATCACAAAAAATCAACCTGAATGGTTCAGAAACATTCTGA  
GCATCGCACCCATAATGTTCTCAAACAAAATGGCGAGACTAGGGAAAGGATACATGTTTCGAAAGTAAG  
AGAATGAAGCTCCGAACACAAATACCAGCAGAAATGCTAGCAAGCATTGACCTAAAGTATTTCAATGA  
ATCAACAAGAAAGAAAATTGAGAAAATAAAGCCTCTTCTAATAGATGGCACAGCGTCATTGAGTCCTG  
GAATGATGATGGGCATGTTCAACATGCTAAGTACGGTTTTAGGAGTCTCAATCCTGAATCTTGGGCAA  
AAGAAATACACCAAAAACAATACTGGTGGGATGGACTCCAATCCTCTGATGATTTTGCTCTCATAGT  
GAATGCACCAAATCATGAGGGAATACAAGCAGGAGTGGATAGATTCTACAGGACCTGCAAGTTAGTCG  
GAATCAATATGAGCAAGAAGAAGTCTATATAAATAGGACAGGAACATTTGAATTCACAAGCTTTTTT  
TATCGCTATGGATTTGTAGCCAATTTTAGCATGGAGCTGCCAGTTTTGGAGTGTCTGGGATTAATGA  
GTCAGCTGATATGAGCATTGGAGTAACAGTGATAAAGAACAACATGATAAACAATGACCTTGGACCAG  
CAACAGCCCAGATGGCTCTTCAACTGTTTCATCAAGGACTACAGATATACATATCGGTGCCACAGAGGA  
GACACACAAATTCAGACGAGGAGATCATTGAGCTAAAGAAGCTGTGGGAGCAAACCCGCTCAAAGGC  
AGGACTATTGGTTTTAGATGGAGGACCAAACCTTATAACAATATCCGGAATCTTCACATCCCTGAAGTCT  
GCTTAAAGTGGGAGCTAATGGATGAGGACTATCAGGGAAGACTTTGTAATCCCCTGAATCCATTTGTC  
AGCCATAAGGAGATTGAGTCTGTAACAATGCTGTGGTAATGCCAGCTCATGGTCCAGCCAAGAGCAT  
GGAATATGACGCTGTTGCAACTACACACTCCTGGATTTCCAAGAGGAACCGCTCTATTCTCAACACAA  
GCCAAAGGGGAATTCTTGAGGATGAACAGATGTATCAGAAGTGCTGCAACCTGTTTCGAGAAATTTTT  
CCCAGTAGTTTCATACAGGAGACCGGTTGGAATTTCCAGCATGGTGGAGGCCATGGTGTCTAGGGCCCG  
GATTGATGCCAGAATTGACTTCGAATCTGGACGGATTAAGAAAGAAGAGTTCGCCGAGATCATGAAGA  
TCTGTTCCACCATTGAAGAGCTCAGACGGCAAAAATAATGAATTTAGCTTGTCTTCATGAAAAAATG  
CCTTGTTTCTACT

Segment 3 UTRS FROM CY003533

>gi|89892485|gb|CY009641.1| Influenza A virus (A/Udorn/72(H3N2))

segment 3, complete sequence

AGCAAAAGCAGGTAAGTATGATTGCGAGATGGAAGATTTTGTGCGACAATGCTTCAATCCGATGATTGTCGA  
GCTTGCAGAAAAGGCAATGAAAGAGTATGGAGAGGATCTGAAAATCGAAACAAACAAATTTGCAGCAA  
TATGCACTCACTTGGAGATATGTTTCATGTATTGAGATTTTCATTTTCATCAATGAACAAGGCGAGTCA  
ATAGTGGTAGAGCTTGATGATCCAAATGCACTGTTAAAGCACAGATTTGAAATAATAGAGGGAAGAGA  
CCGCACAATGGCCTGGACAGTAGTAAACAGTATTTGCAACACTACTGGAGCTGAGAAACCGAAGTTTT  
TGCCAGATTTGTATGATTACAAGGAGAATAGATTTCATCGAGATTGGAGTGACAAGGAGAGAAGTCCAC  
ATATACTACCTTGAAAAGGCCAATAAAATTAATCTGAGAATACACACATCCACATTTTCTCATTAC  
TGGGGAGGAAATGGCCACAAAGGCCGACTACACTCTTGATGATGAAAGCAGGGCTAGGATCAAACCA  
GGCTATTTACCATAAGACAAGAAATGGCCAACAGAGGCCTCTGGGATTCCTTTGTCAGTCCGAAAGA  
GGCGAAGAAACAATTGAAGAAAGATTTGAAATCACAGGAACTATGCGCAGGCTTGCCGACCAAAGTCT  
CCCGCCGAATCTCCTGCCTTGAGAATTTTAGAGCCTATGTGGATGGATTGCAACCGAACGGCTGCA  
TTGAGGGCAAGCTTTCTCAAATGTCCAAAGAAGTGAATGCAAGAATTGAACCTTTTCTGAAGACAACA  
CCAAGACCAATCAAACCTCCGGATGGGCCTCCTGTTTTTCAGCGGTCCAAATTCCTTCTGATGGATGC  
TTTAAATTAAGCATTGAAGACCCAAGTCACGAAGGAGAGGGAATACCACTATATGATGCGATCAAGT  
GCATGAGAACATTCTTTGGATGGAAAGAACCCTATATCGTCAAACCACACGAAAAGGGAATAAATCCA  
AATTATCTGCTGTCATGGAAGCAAGTACTGGCAGAACTACAGGACATTGAAAATGAGGAGAAGATTCC  
AAGAATAAAAACATGAAGAAAACGAGTCAGCTAAAGTGGGCACCTTGGTGAAGACATGGCACCAGAGA  
AAGTAGACTTTGACAACCTGTAGAGACATAAGCGATTTGAAGCAATATGATAGTGACGAACCTGAATTA
